# Supplementary material for: Spatial Distribution Patterns of Root-Associated Bacterial Communities Mediated by Root Exudates in Different Aged Ratooning Tea Monoculture Systems
Source: Int J Mol Sci. 2017 Aug 8;18(8):1727. doi: 10.3390/ijms18081727 (PMC5578117; doi:10.3390/ijms18081727)
Supplement: Supplementary file 1 [file ijms-18-01727-s001.zip › ijms-207312-final-supplymentry dataset.xlsx]

## Sheet: Dataset1
#SampleID	BarcodeSequence	LinkerPrimerSequence
CK1	GTTTCG,ATCACG	GTGCCAGCMGCCGCGGTAA,GGACTACHVGGGTWTCTAAT
CK2	GTTTCG,CGATGT	GTGCCAGCMGCCGCGGTAA,GGACTACHVGGGTWTCTAAT
CK3	GTTTCG,TTAGGC	GTGCCAGCMGCCGCGGTAA,GGACTACHVGGGTWTCTAAT
RS21	GTTTCG,TAGCTT	GTGCCAGCMGCCGCGGTAA,GGACTACHVGGGTWTCTAAT
RS22	GTTTCG,GGCTAC	GTGCCAGCMGCCGCGGTAA,GGACTACHVGGGTWTCTAAT
RS23	GTTTCG,CTTGTA	GTGCCAGCMGCCGCGGTAA,GGACTACHVGGGTWTCTAAT
RP21	GTTTCG,CAGATC	GTGCCAGCMGCCGCGGTAA,GGACTACHVGGGTWTCTAAT
RP22	GTTTCG,ACTTGA	GTGCCAGCMGCCGCGGTAA,GGACTACHVGGGTWTCTAAT
RP23	GTTTCG,GATCAG	GTGCCAGCMGCCGCGGTAA,GGACTACHVGGGTWTCTAAT
ES21	GTTTCG,TGACCA	GTGCCAGCMGCCGCGGTAA,GGACTACHVGGGTWTCTAAT
ES22	GTTTCG,ACAGTG	GTGCCAGCMGCCGCGGTAA,GGACTACHVGGGTWTCTAAT
ES23	GTTTCG,GCCAAT	GTGCCAGCMGCCGCGGTAA,GGACTACHVGGGTWTCTAAT
RS301	GTTTCG,GTGAAA	GTGCCAGCMGCCGCGGTAA,GGACTACHVGGGTWTCTAAT
RS302	GTTTCG,GTGGCC	GTGCCAGCMGCCGCGGTAA,GGACTACHVGGGTWTCTAAT
RS303	GTTTCG,GGCCTG	GTGCCAGCMGCCGCGGTAA,GGACTACHVGGGTWTCTAAT
RP301	GTTTCG,CCGTCC	GTGCCAGCMGCCGCGGTAA,GGACTACHVGGGTWTCTAAT
RP302	GTTTCG,GTAGAG	GTGCCAGCMGCCGCGGTAA,GGACTACHVGGGTWTCTAAT
RP303	GTTTCG,GTCCGC	GTGCCAGCMGCCGCGGTAA,GGACTACHVGGGTWTCTAAT
RP303	GTTTCG,GTCCGC	GTGCCAGCMGCCGCGGTAA,GGACTACHVGGGTWTCTAAT
ES301	GTTTCG,AGTCAA	GTGCCAGCMGCCGCGGTAA,GGACTACHVGGGTWTCTAAT
ES302	GTTTCG,AGTTCC	GTGCCAGCMGCCGCGGTAA,GGACTACHVGGGTWTCTAAT
ES303	GTTTCG,ATGTCA	GTGCCAGCMGCCGCGGTAA,GGACTACHVGGGTWTCTAAT

## Sheet: Dataset2
#Sample_name	Total_reads	Combined_reads	Uncombined_reads	Percent_combined(%)	Combined_base(bp)	Min_len(bp)	Max_len(bp)	Avg_len(bp)
CK1	64132	63236	896	98.6	16007620	44	390	253
CK2	75429	74619	810	98.93	18891759	207	370	253
CK3	60482	59941	541	99.11	15176733	62	362	253
RS21	72757	72210	547	99.25	18274843	53	387	253
RS22	76316	75795	521	99.32	19182666	146	387	253
RS23	76042	75313	729	99.04	19063651	166	389	253
RP21	60492	60042	450	99.26	15197577	44	378	253
RP22	64568	64170	398	99.38	16236983	219	372	253
RP23	74075	73633	442	99.4	18632500	44	375	253
ES21	67251	66775	476	99.29	16882283	137	362	253
ES22	73191	72671	520	99.29	18374747	160	386	253
ES23	78596	78049	547	99.3	19731722	55	382	253
RS301	78391	77861	530	99.32	19717021	134	371	253
RS302	50907	50545	362	99.29	12801878	46	386	253
RS303	76979	76385	594	99.23	19341829	107	373	253
RP301	57730	57385	345	99.4	14520279	44	361	253
RP302	72599	72151	448	99.38	18255475	198	376	253
RP303	68506	68094	412	99.4	17228120	200	383	253
ES301	66258	65853	405	99.39	16645731	166	388	253
ES302	69240	68835	405	99.42	17410418	133	373	253
ES303	68952	68540	412	99.4	17334633	156	339	253
#Total	1452893	1442103	10790	99.26	364908468	219	339	253
Average	69185.4	68671.6

## Sheet: Dataset3
Sample Name	Raw PE(#)	Combined(#)	Qualified(#)	Nochime(#)	Base(nt)	AvgLen(nt)	Q20	Q30	GC%	Effective%
CK1	64132	63236	62601	61374	15526986	253	99.42	98.8	56.28	95.7
CK2	75429	74619	73907	73136	18507534	253	99.43	98.83	57.2	96.96
CK3	60482	59941	59311	58520	14807454	253	99.43	98.79	57.13	96.76
RS21	72757	72210	71479	70526	17839739	253	99.43	98.83	56.51	96.93
RS22	76316	75795	75058	73843	18678769	253	99.4	98.76	56.57	96.76
RS23	76042	75313	74591	73763	18661640	253	99.43	98.81	56.48	97
RP21	60492	60042	59459	58740	14861610	253	99.46	98.9	56.61	97.1
RP22	64568	64170	63559	63193	15981005	253	99.42	98.8	56.43	97.87
RP23	74075	73633	72966	72398	18310673	253	99.44	98.85	56.49	97.74
ES21	67251	66775	66146	65277	16495182	253	99.44	98.84	55.33	97.06
ES22	73191	72671	71982	70754	17880922	253	99.43	98.82	55.49	96.67
ES23	78596	78049	77313	76429	19311455	253	99.44	98.84	55.66	97.24
RS301	78391	77861	77102	76327	19319634	253	99.44	98.84	56.43	97.37
RS302	50907	50545	50040	48865	12369083	253	99.43	98.8	56.72	95.99
RS303	76979	76385	75623	73765	18671244	253	99.4	98.77	56.9	95.82
RP301	57730	57385	56734	56000	14161101	253	99.47	98.87	56.5	97
RP302	72599	72151	71492	70422	17808081	253	99.45	98.86	56.27	97
RP303	68506	68094	67485	66691	16865436	253	99.47	98.89	56.41	97.35
ES301	66258	65853	65242	64611	16322448	253	99.46	98.89	55.28	97.51
ES302	69240	68835	68227	67612	17091075	253	99.45	98.87	55.56	97.65
ES303	68952	68540	67920	67346	17023358	253	99.46	98.88	55.56	97.67
#Total	1452893	1442103	1428237	1409592
Average	69185.4	68671.6	68011.3	67123.4

## Sheet: Dataset4
Sample_Name	Kingdom	Phylum	Class	Order	Family	Genus	Species
CK1	57936	56670	55703	52142	41725	25058	5185
CK2	69993	67397	65907	60600	46229	24313	3071
CK3	55619	53767	52542	48214	35170	18856	3122
RS21	67788	65245	61465	55948	45199	28248	3820
RS22	69920	67194	64265	59463	46071	27825	3695
RS23	69859	67092	63349	56877	45213	28107	3706
RP21	56209	55402	53729	51145	45737	19063	3226
RP22	62374	61574	59787	57522	53578	20073	3322
RP23	71408	70449	68394	65800	61146	22941	3761
ES21	63866	63420	62865	61654	59125	49315	4547
ES22	68962	68527	67906	66690	63862	51773	6283
ES23	75148	74741	74165	72776	70187	59075	5986
RS301	73780	71149	66561	60763	49283	30923	4106
RS302	45510	44089	41813	38322	30853	19249	2276
RS303	68013	65725	61385	55649	42869	26997	3178
RP301	54795	54499	53921	53203	51139	9235	1613
RP302	69267	68849	67961	66982	64479	16519	3209
RP303	65822	65536	64945	64207	62254	11674	2341
ES301	63747	63562	63248	62654	60636	29270	6429
ES302	66942	66749	66403	65713	63443	29433	6603
ES303	66702	66438	66037	65223	63115	31355	6452
TOTAL#	1363660	1338074	1302351	1241547	1101313	579302	85931

## Sheet: Dataset5
Sample_Name	Total_tag	Taxon_Tag	Unclassified_Tag	Unique_Tag	OTU_num
CK1	61374	57936	0	3438	3387
CK2	73136	69993	0	3143	3238
CK3	58520	55619	0	2901	3357
RS21	70526	67788	0	2738	2971
RS22	73843	69920	0	3923	2941
RS23	73763	69859	0	3904	3684
RP21	58740	56209	0	2531	3319
RP22	63193	62374	0	819	2316
RP23	72398	71408	0	990	2515
ES21	65277	63866	0	1411	2232
ES22	70754	68962	0	1792	2509
ES23	76429	75148	0	1281	2467
RS301	76327	73780	0	2547	3017
RS302	48865	45510	0	3355	3084
RS303	73765	68013	0	5752	2864
RP301	56000	54795	0	1205	2083
RP302	70422	69267	0	1155	1932
RP303	66691	65822	0	869	1741
ES301	64611	63747	0	864	1695
ES302	67612	66942	0	670	1735
ES303	67346	66702	0	644	1632
total#	1210023	1166269		43754	54719
Average	67223.5	64792.7		2430.78	2605.67
